# Supplementary material for: Assessing knowledge anxiety in researchers: a comprehensive measurement scale
Source: PeerJ journal article supplement (doi:10.7717/peerj.18478), 2024-11-29
Supplement: Chinese_original_questionnairee.docx [file Chinese_original_questionnairee.docx]

**您在学习和创造过程中经历过知识焦虑吗？**

亲爱的学者：

       您好！非常感谢您在百忙之中抽出宝贵的时间填写该问卷。随着科技进步和社会需求的改变，科学研究的对象日益复杂化，科学研究向多学科交叉方向发展。在进行科学研究和知识创造的过程中，我们需要时常关注科研领域的前沿知识并补充自身研究所需的各类知识，然而面对深奥的专业知识和庞杂的知识体系，我们常常会感到无所适从，从而产生紧张、沮丧、困惑、逃避等一系列不良情绪或行为。问卷分为三个部分：第一部分关注您的基本特质和背景信息；第二部分探讨您对知识付费行为的看法和偏好，网络知识付费行为包括下载付费文档、参与在线付费课程、向他人付费提问、订阅付费内容、打赏以及付费围观等；第三部分则聚焦在社会化问答中的消费、参与和创造行为。我们希望通过这份问卷，更好地理解您的需求和期望，进而为学术界和知识服务提供者提供有价值的参考。请您根据自身情况，在每个题目后面选择一个最符合您实际情况的选项。本次问卷采用匿名的方式，所有数据仅供学术研究使用，您的回答将被严格保密，答案无对错之分，也不涉及道德问题，请结合自身情况进行客观填写。

       感谢您在百忙之中接受我们的调查！

第一部分:基本情况

1. 您的性别是？ [单选题] *

| ○男 |
| --- |
| ○女 |

2. 您所处于的年龄段是? [单选题] *

| ○18-25岁 |
| --- |
| ○26-35岁 |
| ○36-45岁 |
| ○45-55岁 |
| ○55岁及以上 |

3.  您的最高学历是: [单选题] *

| ○专科 |
| --- |
| ○本科 |
| ○硕士 |
| ○博士 |

4. 婚姻状态？ [单选题] *

| ○已婚 |
| --- |
| ○未婚 |

5. 您目前从事的职业： [单选题] *

| ○市场/销售/商务 | ○采购 | ○行政 |
| --- | --- | --- |
| ○人力 | ○产品/运营人员 | ○个体经营者 |
| ○财务/会计/出纳/审计 | ○企业管理者 | ○律师/法务 |
| ○设计从业者 | ○服务业人员 | ○技术开发/工程师 |
| ○农林牧渔劳动者 | ○工人劳动者 | ○全职家庭主妇/夫 |
| ○自由职业 | ○离休/退休 | ○学生 |
| ○老师 | ○医护人员 | ○科研人员 |
| ○党政机关人员 | | |

6. 收入区间？ [单选题] *

| ○4000以下 |
| --- |
| ○4000-8000 |
| ○8000-12000 |
| ○12000以上 |

7. 可以接受每次用于知识付费的预算大致是多少？ [单选题] *

| ○200元以下 |
| --- |
| ○200-1000元 |
| ○1000-5000元 |
| ○5000元以上 |

8. 请选择您进行过的网络知识付费行为: [多选题] *

| □下载付费文档（如:知网等数据库中的资料） |
| --- |
| □参与在线付费课程（如:学术志、网易云课堂等的付费课程） |
| □付费提问（如:付费悬赏问题答案） |
| □订阅付费内容（如:在喜马拉雅FM订阅付费栏目） |
| □打赏（如:打赏微博、微信文章） |
| □从未进行过网络知识付费 |

第二部分:当前知识经济时代，知识付费已成为获取高质量信息和专业服务的重要途径，根据您的实际情况选择最符合的选项。（1=完全不符合，2=基本不符合，3=一般，4=基本符合，5=完全符合）

感知有用性

9.

我认为知识付费产品可以帮助获取自己想要的信息。

[单选题] *

| ○很不符合 | ○不符合 | ○一般 | ○符合 | ○很符合 |
| --- | --- | --- | --- | --- |

10.

我认为知识付费产品能够帮助我提升自己。

[单选题] *

| ○很不符合 | ○不符合 | ○一般 | ○符合 | ○很符合 |
| --- | --- | --- | --- | --- |

11.

我认为知识付费产品可以节约时间提高效率。

[单选题] *

| ○很不符合 | ○不符合 | ○一般 | ○符合 | ○很符合 |
| --- | --- | --- | --- | --- |

12. 我认为知识付费产品能够提供更专业性的内容 [单选题] *

| ○很不符合 | ○不符合 | ○一般 | ○符合 | ○很符合 |
| --- | --- | --- | --- | --- |

感知信任

13.

我觉得这个知识付费产品非常吸引人。

[单选题] *

| ○很不符合 | ○不符合 | ○一般 | ○符合 | ○很符合 |
| --- | --- | --- | --- | --- |

14.

我相信这个知识付费产品供应商是可靠的。

[单选题] *

| ○很不符合 | ○不符合 | ○一般 | ○符合 | ○很符合 |
| --- | --- | --- | --- | --- |

15. 我相信知识付费产品购买后会解决/缓解我的焦虑。 [单选题] *

| ○很不符合 | ○不符合 | ○一般 | ○符合 | ○很符合 |
| --- | --- | --- | --- | --- |

付费意向

16.

我打算不久（三月内）将购买知识付费产品

[单选题] *

| ○很不符合 | ○不符合 | ○一般 | ○符合 | ○很符合 |
| --- | --- | --- | --- | --- |

17.

我可能会在未来考虑购买知识付费产品。

[单选题] *

| ○很不符合 | ○不符合 | ○一般 | ○符合 | ○很符合 |
| --- | --- | --- | --- | --- |

18. 我有购买知识付费产品的计划。 [单选题] *

| ○很不符合 | ○不符合 | ○一般 | ○符合 | ○很符合 |
| --- | --- | --- | --- | --- |

付费行为

19.

我会在有需要的时购买知识付费产品。

[单选题] *

| ○很不符合 | ○不符合 | ○一般 | ○符合 | ○很符合 |
| --- | --- | --- | --- | --- |

20.

我会持续购买需要的知识付费产品。

[单选题] *

| ○很不符合 | ○不符合 | ○一般 | ○符合 | ○很符合 |
| --- | --- | --- | --- | --- |

21. 在未来我会选择使用知识付费产品 [单选题] *

| ○很不符合 | ○不符合 | ○一般 | ○符合 | ○很符合 |
| --- | --- | --- | --- | --- |

第三部分:社会化问答已成为知识分享和交流的重要组成部分，本部分问卷旨在评估社会化问答社区中的行为模式，包括用户的消费、参与和创造行为。根据您的实际情况选择最符合的选项。（1=完全不符合，2=基本不符合，3=一般，4=基本符合，5=完全符合）

消费行为

22.

经常浏览问答社区的信息。

[单选题] *

| 很不符合 | ○1 | ○2 | ○3 | ○4 | ○5 | 很符合 |
| --- | --- | --- | --- | --- | --- | --- |

23.

经常下载问答社区的信息。

[单选题] *

| 很不符合 | ○1 | ○2 | ○3 | ○4 | ○5 | 很符合 |
| --- | --- | --- | --- | --- | --- | --- |

24.

经常引用问答社区的信息。

[单选题] *

| 很不符合 | ○1 | ○2 | ○3 | ○4 | ○5 | 很符合 |
| --- | --- | --- | --- | --- | --- | --- |

参与行为

25.

会关注问答社区中我感兴趣的人。

[单选题] *

| 很不符合 | ○1 | ○2 | ○3 | ○4 | ○5 | 很符合 |
| --- | --- | --- | --- | --- | --- | --- |

26.

会关注问答社区中感兴趣的话题/回答。

[单选题] *

| 很不符合 | ○1 | ○2 | ○3 | ○4 | ○5 | 很符合 |
| --- | --- | --- | --- | --- | --- | --- |

27.

经常收藏/引用问答社区中感兴趣的回答。

[单选题] *

| 很不符合 | ○1 | ○2 | ○3 | ○4 | ○5 | 很符合 |
| --- | --- | --- | --- | --- | --- | --- |

创造行为

28.

经常在问答社区提问。

[单选题] *

| 很不符合 | ○1 | ○2 | ○3 | ○4 | ○5 | 很符合 |
| --- | --- | --- | --- | --- | --- | --- |

29.

经常在问答社区回答其他用户提出的问题。

[单选题] *

| 很不符合 | ○1 | ○2 | ○3 | ○4 | ○5 | 很符合 |
| --- | --- | --- | --- | --- | --- | --- |

30.

愿意在问答社区帮助其他用户。

[单选题] *

| 很不符合 | ○1 | ○2 | ○3 | ○4 | ○5 | 很符合 |
| --- | --- | --- | --- | --- | --- | --- |
