# Supplementary material for: Assessing knowledge anxiety in researchers: a comprehensive measurement scale
Source: PeerJ journal article supplement (doi:10.7717/peerj.18478), 2024-11-29
Supplement: Formal_questionnaire_data.xlsx [file Formal_questionnaire_data.xlsx]

## Sheet: Sheet1
number	sex	age	Educational background	Working years	Subject category	research attitude	Q1	Q2	Q3	Q4	Q5	Q6	Q7	Q8	Q9	Q10	Q11	Q12	Q13	Q14	Q15	Q16	Q17	Q18	Q19	Q20	Q21	Q22	Total
1	2	3	4	3	3	2	4	5	5	5	4	5	5	5	5	5	4	5	5	5	4	4	4	1	4	5	4	4	97
2	2	2	3	1	6	3	5	3	5	5	5	3	5	5	5	5	5	5	5	5	5	5	3	4	2	3	5	3	96
3	1	3	4	1	2	3	5	5	5	5	5	5	5	1	5	1	1	5	4	5	5	5	5	5	1	5	5	5	93
4	2	1	3	1	1	3	5	2	5	5	5	4	5	5	5	4	5	5	4	5	4	4	4	3	2	4	4	4	93
5	2	3	3	2	2	3	4	3	4	4	5	5	4	4	5	5	5	5	5	5	4	4	4	3	4	4	3	4	93
6	2	1	3	1	1	2	4	4	5	4	5	5	5	4	5	5	4	5	4	5	3	3	3	4	3	3	5	4	92
7	2	4	3	5	1	1	4	4	4	3	4	5	4	5	4	4	4	5	5	5	5	4	3	4	3	4	5	4	92
8	2	1	4	1	1	2	4	3	4	4	4	4	3	4	4	5	4	5	5	4	5	5	4	4	4	4	5	4	92
9	2	1	3	1	1	4	4	2	4	4	5	4	4	5	5	5	4	4	4	4	5	4	4	1	4	5	5	4	90
10	2	2	3	1	5	3	5	5	5	5	5	5	5	3	5	4	4	5	5	5	2	2	2	4	2	2	5	5	90
11	2	1	3	1	1	2	4	4	5	5	2	5	5	5	5	5	5	4	5	4	3	3	2	4	4	1	5	5	90
12	2	3	3	2	2	1	5	5	4	1	4	5	4	5	5	3	5	5	4	5	3	3	2	4	2	4	5	5	88
13	2	3	3	3	2	2	4	4	5	4	5	5	5	5	5	4	4	5	4	5	4	2	3	4	2	3	4	2	88
14	2	3	3	2	1	3	4	3	4	4	4	5	5	4	4	4	4	4	4	4	4	4	3	4	3	2	5	5	87
15	1	3	2	1	1	1	5	4	5	4	5	5	5	4	4	4	4	4	4	4	2	3	3	1	3	5	4	5	87
16	2	3	4	3	4	4	4	3	4	4	4	4	5	3	5	5	5	5	5	5	3	3	4	3	2	3	4	3	86
17	2	3	3	4	2	2	5	4	5	5	5	5	4	2	4	4	4	4	4	5	5	3	4	4	3	3	2	2	86
18	2	4	3	4	1	3	5	5	5	4	4	5	3	4	4	4	3	4	4	4	4	3	3	4	3	3	4	4	86
19	2	3	3	2	3	4	4	3	5	5	4	4	5	3	5	5	3	4	4	5	3	3	3	3	3	3	4	4	85
20	1	4	3	5	2	2	5	4	5	4	4	5	4	4	5	3	4	5	4	4	2	4	4	3	3	4	1	4	85
21	2	5	1	1	6	1	5	4	4	4	4	4	4	4	4	4	4	4	4	4	4	3	4	4	2	3	4	4	85
22	1	1	3	1	1	2	4	4	5	4	4	4	4	4	4	4	5	5	4	4	3	3	3	4	2	4	4	3	85
23	2	3	4	1	1	3	2	4	4	4	4	4	4	3	4	4	4	4	4	4	4	4	4	4	2	3	5	5	84
24	2	2	3	1	2	2	5	4	5	4	4	4	5	4	5	5	4	4	4	5	2	3	2	3	2	2	4	4	84
25	2	4	3	4	2	1	4	4	4	4	4	5	4	4	4	4	4	4	5	4	3	3	3	5	2	3	4	3	84
26	1	2	4	2	3	1	5	5	5	4	4	5	4	4	5	4	4	5	4	4	1	1	2	3	2	3	5	5	84
27	2	3	3	2	2	1	4	4	4	4	4	4	5	4	4	4	4	4	4	4	2	3	3	4	2	3	5	5	84
28	2	2	3	1	4	3	4	3	5	4	4	5	3	5	5	4	5	4	4	5	3	3	3	3	3	3	3	3	84
29	2	3	3	2	2	3	4	4	2	4	5	5	4	4	4	5	5	4	4	4	2	2	4	3	3	3	5	4	84
30	1	3	3	2	1	3	4	4	4	2	4	4	4	4	4	4	4	4	4	4	4	4	4	2	4	4	4	4	84
31	2	4	3	5	1	3	5	4	5	3	5	4	4	4	4	3	3	4	4	5	3	3	3	4	3	2	4	5	84
32	2	3	3	2	1	3	5	4	3	2	4	4	4	4	4	5	4	5	5	4	4	3	3	4	2	3	4	4	84
33	1	2	3	1	6	2	4	3	4	4	4	5	4	3	4	5	4	5	5	5	2	3	3	4	3	3	3	3	83
34	1	4	2	2	2	3	4	4	3	4	4	5	4	4	4	5	4	4	4	4	3	3	3	4	2	3	4	4	83
35	2	2	2	1	5	1	5	5	4	4	4	2	4	3	4	4	4	4	4	4	4	2	2	5	4	2	5	4	83
36	2	4	2	5	3	3	5	5	5	2	4	4	4	4	5	5	4	4	4	3	2	2	2	5	3	4	4	3	83
37	1	3	4	3	1	2	4	4	4	2	5	3	4	5	5	4	4	4	4	4	2	3	3	4	2	4	5	4	83
38	2	2	4	2	1	2	4	3	4	3	4	5	5	4	5	5	5	4	4	2	3	3	3	2	3	2	5	5	83
39	2	1	2	1	6	2	5	5	5	4	2	4	4	4	4	4	4	4	4	4	2	3	4	1	4	4	4	4	83
40	1	4	2	5	4	2	4	4	4	4	5	4	4	4	4	4	4	4	4	5	3	2	3	4	2	2	4	4	82
41	2	3	3	4	2	3	5	4	5	4	4	4	4	4	4	4	4	4	4	5	2	3	3	2	4	4	3	2	82
42	2	4	3	4	1	4	4	3	4	2	3	5	5	4	4	5	4	4	4	5	4	3	4	3	3	3	3	3	82
43	1	4	3	4	4	2	4	4	3	3	5	2	5	5	5	5	5	3	4	5	3	2	2	2	1	4	5	5	82
44	2	2	4	1	1	2	4	4	4	4	4	4	2	4	5	5	4	4	5	3	4	3	3	4	3	2	4	3	82
45	2	2	3	1	1	3	4	3	4	4	3	5	4	4	4	5	4	4	4	5	3	3	3	4	2	2	4	4	82
46	2	1	4	1	1	2	5	4	5	2	4	3	4	4	5	5	5	4	3	3	4	3	4	4	2	3	2	4	82
47	2	1	2	1	4	3	4	4	4	3	4	4	4	4	4	4	3	4	4	5	4	3	3	3	2	3	4	4	81
48	1	2	4	1	2	2	4	4	4	4	4	4	4	4	4	4	4	4	4	4	2	3	3	2	3	3	5	4	81
49	1	3	4	3	2	1	4	4	4	4	4	4	4	4	4	4	4	4	4	4	3	3	3	2	3	3	4	4	81
50	2	4	4	2	1	2	5	4	4	3	4	2	5	5	4	5	4	4	4	3	4	3	2	5	1	3	4	3	81
51	2	3	3	3	1	3	4	3	4	4	4	4	4	4	4	4	4	4	4	4	3	3	3	4	3	4	4	2	81
52	2	3	3	2	2	4	3	3	4	4	4	4	3	4	4	4	4	4	4	4	4	4	3	3	3	3	4	4	81
53	2	4	3	4	2	2	5	4	4	5	1	5	4	4	4	5	3	4	5	4	3	3	2	5	1	3	4	3	81
54	2	3	3	4	6	3	4	4	4	4	4	4	4	4	4	4	4	4	4	4	4	2	3	4	2	4	4	2	81
55	2	4	3	2	1	3	4	3	4	4	4	4	4	4	4	4	4	3	4	4	3	3	3	2	4	4	4	4	81
56	2	1	2	1	3	2	4	4	5	3	4	4	4	3	5	5	2	4	4	4	4	4	3	3	3	3	4	2	81
57	2	1	3	1	3	2	4	3	4	4	3	4	4	4	5	4	4	3	5	3	3	3	3	3	2	3	5	5	81
58	1	1	3	1	1	2	5	4	5	3	4	3	5	4	3	4	5	4	4	4	3	3	2	3	1	4	5	2	80
59	1	1	3	1	1	2	5	4	5	3	4	3	5	4	3	4	5	4	4	4	3	3	2	3	1	4	5	2	80
60	1	1	3	1	1	2	5	4	5	3	4	3	5	4	3	4	5	4	4	4	3	3	2	3	1	4	5	2	80
61	1	1	3	1	2	1	4	4	4	4	4	5	4	5	4	3	4	5	4	4	3	3	2	2	2	3	4	3	80
62	1	1	3	1	2	1	4	4	4	4	4	5	4	5	4	3	4	5	4	4	3	3	2	2	2	3	4	3	80
63	2	3	3	1	2	3	4	2	4	4	4	5	4	4	5	4	4	4	4	4	4	3	3	2	3	3	2	4	80
64	2	3	3	3	2	2	5	4	4	4	4	5	4	3	4	4	2	5	5	5	3	3	2	1	4	4	3	2	80
65	2	1	3	1	1	2	5	4	4	3	4	4	4	3	4	5	4	4	4	4	3	2	3	4	2	2	4	4	80
66	1	3	4	3	4	2	3	4	4	4	4	3	4	3	4	4	4	4	4	4	3	3	3	4	3	3	4	4	80
67	1	3	3	4	1	1	5	5	5	4	5	4	4	2	4	4	4	4	4	4	2	2	2	4	2	2	4	4	80
68	1	3	4	2	2	3	3	3	4	4	4	3	4	4	4	4	4	4	4	4	3	3	3	4	3	3	4	4	80
69	2	4	4	5	1	3	5	3	5	2	4	4	5	2	4	5	4	4	2	4	3	4	4	2	2	3	5	4	80
70	1	1	3	1	1	2	4	4	3	4	3	5	4	5	5	4	2	4	5	4	1	2	3	3	3	2	4	5	79
71	1	4	3	5	4	1	4	4	3	2	5	2	5	5	4	3	3	3	3	5	4	4	3	3	3	3	4	4	79
72	2	2	3	1	1	2	5	5	4	3	4	4	4	4	4	4	4	4	5	4	2	2	2	4	2	3	2	4	79
73	1	3	3	2	2	2	4	3	4	3	4	4	4	5	5	4	4	4	4	4	2	3	3	3	2	2	4	4	79
74	2	1	3	1	4	2	5	5	4	2	4	4	3	4	4	4	4	5	4	3	4	4	4	2	4	2	2	2	79
75	1	4	2	5	4	2	4	4	5	4	4	4	4	4	4	4	4	4	4	4	3	3	2	3	2	3	3	3	79
76	2	4	4	4	1	1	5	5	3	3	3	3	5	1	3	5	3	4	4	5	3	3	3	5	1	2	5	5	79
77	2	2	3	2	2	2	4	2	4	5	4	4	4	4	4	4	4	4	4	4	2	4	4	2	3	3	4	2	79
78	2	1	4	1	1	1	5	4	5	4	4	3	4	3	3	5	5	5	5	5	3	2	2	4	2	2	1	3	79
79	1	1	3	2	2	2	5	4	5	5	4	2	5	5	4	5	2	5	5	2	2	2	2	2	2	3	4	4	79
80	2	2	4	1	4	2	4	4	5	4	4	4	4	4	4	4	4	4	4	5	2	2	2	4	2	2	4	2	78
81	2	3	3	5	1	2	4	4	5	4	4	2	4	4	5	4	4	4	4	2	3	2	2	4	2	2	5	4	78
82	1	3	2	3	4	2	4	4	4	4	5	4	4	3	4	4	4	5	4	4	2	2	2	3	3	2	4	3	78
83	2	3	4	2	1	2	5	4	4	4	4	4	4	4	4	4	4	4	4	4	2	2	2	4	2	2	4	3	78
84	1	3	4	2	2	3	4	4	4	4	4	4	3	4	3	4	4	4	4	4	3	3	3	3	3	3	3	3	78
85	2	1	3	1	1	2	5	3	2	2	4	4	3	4	4	4	4	4	3	4	2	4	4	4	4	4	4	2	78
86	1	5	2	5	6	2	4	4	4	3	4	4	4	4	4	4	2	4	4	2	3	3	3	2	4	4	4	4	78
87	1	1	3	1	1	1	4	4	5	3	4	4	4	4	4	4	4	4	4	2	2	3	3	4	2	2	4	4	78
88	1	4	4	4	1	2	5	5	4	4	5	3	3	3	4	3	4	4	3	4	4	2	2	4	2	3	4	2	77
89	2	4	3	5	1	1	3	4	4	4	4	4	4	4	4	4	4	4	4	4	2	2	2	4	2	2	4	4	77
90	1	1	3	1	1	2	5	5	5	3	3	4	5	5	5	4	5	5	5	4	2	2	1	5	1	1	1	1	77
91	2	4	4	4	4	3	4	3	5	3	4	3	4	3	4	4	3	4	4	4	3	3	3	4	3	3	4	2	77
92	1	2	3	2	3	2	4	4	5	4	4	4	4	4	4	4	4	4	3	3	2	2	2	3	3	2	4	4	77
93	1	1	3	1	1	2	4	4	3	3	4	4	4	3	4	3	4	4	4	3	3	3	3	4	3	3	3	4	77
94	1	1	3	1	1	2	4	4	3	3	4	4	4	3	4	3	4	4	4	3	3	3	3	4	3	3	3	4	77
95	2	4	4	5	4	2	4	3	4	3	3	4	5	3	3	4	3	4	4	5	3	3	2	3	2	3	5	4	77
96	2	4	2	3	1	3	5	4	5	4	4	4	3	2	4	4	2	4	4	4	2	4	2	3	4	3	4	2	77
97	2	4	3	5	6	3	4	3	3	2	4	4	4	4	4	4	4	4	3	4	4	5	4	1	3	4	2	3	77
98	1	1	3	1	1	2	4	4	3	3	4	4	4	3	4	3	4	4	4	3	3	3	3	4	3	3	3	4	77
99	2	4	3	4	1	3	5	5	5	5	5	2	2	3	4	4	4	4	3	5	3	2	2	3	2	3	3	3	77
100	2	1	3	1	1	2	5	3	5	2	2	4	4	3	4	5	4	4	4	4	4	3	3	2	2	3	5	2	77
101	1	2	4	3	1	2	4	4	4	3	4	4	5	2	4	5	2	4	4	2	3	2	2	4	2	4	5	4	77
102	2	2	3	1	1	3	4	4	5	3	4	2	5	4	5	4	4	4	4	4	3	3	2	2	2	2	5	2	77
103	1	2	3	2	1	3	4	3	3	4	4	4	3	4	4	3	4	3	3	4	3	3	3	4	3	3	4	4	77
104	2	1	3	1	1	3	4	3	4	4	4	3	4	3	4	4	4	4	4	4	3	2	3	2	3	3	4	4	77
105	2	2	4	2	3	2	5	3	4	5	3	4	4	2	4	5	4	4	4	5	3	3	3	3	3	3	2	1	77
106	2	1	3	1	2	2	4	4	4	4	4	4	4	4	4	4	4	4	4	4	2	2	2	3	3	2	4	2	76
107	2	1	2	1	4	3	5	3	5	3	3	5	5	4	4	4	4	4	4	3	1	1	3	3	1	1	5	5	76
108	1	4	3	5	3	2	5	4	4	3	3	2	3	4	4	4	4	5	3	4	3	3	3	2	3	3	4	3	76
109	2	2	3	2	2	2	4	3	4	4	4	4	4	3	4	2	4	4	4	4	3	3	3	3	2	3	4	3	76
110	2	2	4	1	4	3	4	4	4	2	4	3	4	2	3	5	4	4	3	5	3	3	3	4	1	1	5	5	76
111	1	3	4	3	1	2	4	3	4	1	5	3	4	2	4	4	2	4	2	4	4	4	4	2	4	4	5	3	76
112	2	1	3	1	2	2	5	4	3	3	3	3	4	3	3	4	4	4	4	4	3	3	2	4	2	3	5	3	76
113	1	1	3	1	1	1	4	4	5	3	4	4	3	3	4	4	4	5	4	3	2	2	2	3	2	4	4	3	76
114	1	2	4	2	1	2	5	4	4	4	5	4	2	4	4	4	4	4	4	4	1	2	1	5	1	2	3	4	75
115	2	3	3	5	2	4	2	2	3	4	3	3	4	4	4	5	3	4	4	4	4	3	4	3	3	4	3	2	75
116	1	1	3	1	1	2	4	3	4	4	4	4	4	3	4	4	4	4	4	4	4	2	3	4	3	2	2	1	75
117	1	4	3	5	3	2	5	5	5	2	4	4	4	3	4	4	3	4	3	3	3	2	3	3	2	2	4	3	75
118	2	3	4	3	1	2	5	4	4	2	4	4	3	3	4	4	4	4	4	3	2	2	3	4	2	2	4	4	75
119	1	1	3	1	2	3	4	2	1	3	3	3	4	4	4	4	4	5	5	4	3	3	3	4	1	4	5	2	75
120	2	2	3	1	2	3	5	4	4	2	4	2	4	2	4	3	4	4	4	4	4	2	4	4	2	3	4	2	75
121	2	2	3	2	2	2	4	4	4	4	4	3	3	3	3	3	3	3	3	5	3	3	3	3	3	3	3	4	74
122	1	3	4	3	4	2	4	4	4	3	4	4	4	3	4	4	4	4	3	4	3	3	2	3	2	2	3	3	74
123	2	3	4	5	2	2	4	4	4	3	4	4	4	2	4	4	4	5	4	4	2	2	2	2	2	2	4	4	74
124	1	2	3	2	4	2	2	2	3	4	4	4	2	3	4	4	4	4	2	4	4	4	3	1	4	2	5	5	74
125	2	3	2	1	4	3	3	1	4	4	3	5	3	4	4	2	3	4	3	4	4	3	2	4	3	2	4	5	74
126	1	3	4	3	4	3	4	3	4	3	5	4	5	2	2	3	4	2	4	5	3	3	3	1	3	2	5	4	74
127	2	2	4	1	1	3	3	2	4	4	4	4	4	4	4	4	4	4	3	4	2	2	2	4	2	2	4	4	74
128	2	3	3	3	4	2	5	4	2	2	5	4	3	3	4	4	4	4	4	3	4	4	4	3	2	2	2	2	74
129	2	1	3	1	3	2	5	4	5	4	4	4	4	4	2	4	4	2	4	3	4	2	2	5	1	1	4	2	74
130	1	5	3	5	2	2	4	4	4	3	3	4	4	3	4	3	4	4	3	4	2	2	2	4	2	2	5	4	74
131	1	1	2	1	4	4	4	2	2	4	4	3	3	3	4	4	3	3	4	4	4	3	3	3	4	3	4	3	74
132	2	3	3	3	2	3	4	3	4	4	3	4	3	2	4	4	2	4	3	4	3	3	3	3	4	3	3	3	73
133	2	3	2	3	2	2	4	4	4	2	4	4	4	2	4	4	3	4	4	3	4	2	3	4	2	2	3	3	73
134	1	4	4	5	1	2	4	5	3	2	3	4	4	4	5	4	4	3	4	1	3	2	2	4	2	4	4	2	73
135	1	1	3	1	1	2	5	3	4	2	4	2	4	4	4	4	3	4	4	4	2	2	2	4	2	2	4	4	73
136	1	3	4	4	1	2	5	4	5	2	4	4	2	2	4	4	4	4	4	2	4	2	4	2	2	4	2	3	73
137	1	4	3	3	1	2	4	4	4	2	4	4	4	4	4	2	2	4	4	2	4	4	2	4	2	3	2	4	73
138	1	2	4	2	1	3	4	3	4	1	1	4	4	2	5	5	2	4	4	5	3	3	2	1	3	4	5	4	73
139	1	3	4	3	4	1	5	5	3	2	4	4	2	4	4	3	2	4	3	3	3	3	3	3	2	2	4	4	72
140	1	2	3	2	3	1	5	3	4	2	4	4	4	3	4	4	3	4	3	4	2	3	2	3	3	2	3	3	72
141	1	1	3	1	1	2	4	4	3	3	4	4	3	3	4	2	3	4	4	3	3	3	3	4	3	3	2	3	72
142	1	1	3	1	1	2	4	4	3	3	4	4	3	3	4	2	3	4	4	3	3	3	3	4	3	3	2	3	72
143	1	1	3	1	1	2	4	4	3	3	4	4	3	3	4	2	3	4	4	3	3	3	3	4	3	3	2	3	72
144	1	1	3	1	1	2	4	4	3	3	4	4	3	3	4	2	3	4	4	3	3	3	3	4	3	3	2	3	72
145	1	1	3	1	1	2	4	4	3	3	4	4	3	3	4	2	3	4	4	3	3	3	3	4	3	3	2	3	72
146	1	1	3	1	1	2	4	4	3	3	4	4	3	3	4	2	3	4	4	3	3	3	3	4	3	3	2	3	72
147	2	3	4	2	1	2	5	4	5	2	4	4	4	2	4	5	5	4	4	4	2	1	2	2	2	2	3	2	72
148	2	3	4	2	1	2	3	5	5	3	4	2	3	4	5	4	4	3	2	4	3	2	2	4	2	2	3	3	72
149	1	2	2	1	2	4	3	3	3	4	4	3	3	2	2	2	2	2	4	4	5	5	5	4	2	3	4	3	72
150	2	2	3	1	1	3	4	3	4	2	4	4	4	3	4	3	4	4	2	4	2	3	2	4	2	4	4	2	72
151	2	2	4	1	3	2	5	3	4	3	3	2	3	3	4	4	4	4	4	4	2	2	3	4	2	2	2	4	71
152	1	4	4	5	1	2	4	3	4	2	4	4	4	2	4	4	4	4	4	4	3	3	2	2	2	2	4	2	71
153	1	2	4	1	2	2	1	3	3	3	4	4	4	4	4	3	4	4	4	4	2	2	3	3	3	3	3	3	71
154	2	4	4	3	2	2	4	3	4	4	3	4	2	3	3	4	3	3	3	4	3	3	3	3	3	3	3	3	71
155	1	3	2	4	3	2	5	4	4	2	4	4	4	4	4	4	4	4	4	4	2	2	2	2	2	2	2	2	71
156	2	3	4	3	2	2	5	5	4	3	3	3	3	3	4	3	3	3	3	3	3	3	3	4	2	3	3	2	71
157	1	3	4	2	4	2	5	4	4	2	2	3	4	2	4	4	2	4	3	4	3	4	3	4	2	4	2	2	71
158	2	3	4	4	1	2	5	5	4	2	2	4	4	2	4	4	4	3	4	2	3	2	2	4	2	2	3	4	71
159	1	2	3	1	1	2	4	4	4	2	4	3	4	4	3	4	3	3	3	2	3	2	2	4	3	3	4	3	71
160	1	3	4	2	1	2	4	3	4	2	4	4	4	4	4	4	4	3	3	3	2	2	3	2	2	3	4	3	71
161	2	4	2	3	1	1	4	4	5	3	3	5	4	3	3	2	3	3	3	3	3	3	2	4	2	3	4	2	71
162	1	4	3	5	4	3	4	3	4	2	4	5	3	3	4	2	4	4	4	3	3	2	2	2	2	3	5	3	71
163	2	2	4	1	1	1	5	5	4	2	3	4	4	3	4	4	4	4	4	4	1	2	2	4	1	1	4	2	71
164	1	4	4	3	1	1	5	4	4	3	3	4	4	3	3	4	4	4	4	3	2	2	2	3	2	2	3	2	70
165	2	4	3	4	2	2	4	3	4	2	4	4	2	2	3	3	1	4	4	4	3	3	3	4	3	2	4	4	70
166	1	3	4	2	2	3	5	3	5	2	5	2	5	3	2	4	4	3	2	4	2	2	2	3	2	3	4	3	70
167	1	3	3	3	4	2	4	2	4	4	4	4	2	2	4	3	2	4	4	4	3	2	3	4	3	3	2	3	70
168	1	5	1	5	6	3	3	3	3	3	4	3	4	4	5	4	3	3	2	5	1	2	4	1	2	3	3	5	70
169	2	4	2	1	6	2	5	4	2	2	4	4	3	3	4	3	4	4	4	3	3	3	3	2	2	4	2	2	70
170	2	4	3	4	1	3	4	4	4	4	4	2	3	2	3	2	3	4	3	4	3	3	3	4	4	3	1	3	70
171	2	1	4	1	1	2	5	4	4	2	5	5	3	2	4	4	4	4	2	3	3	1	3	4	2	2	2	2	70
172	1	4	3	4	2	2	5	4	4	3	4	4	4	3	4	3	3	3	2	3	2	2	3	4	3	2	3	2	70
173	2	4	2	5	1	2	4	5	4	2	3	4	4	2	4	4	2	4	2	2	3	2	2	4	2	3	4	4	70
174	1	5	2	5	1	2	4	4	4	2	2	2	4	3	4	4	4	4	3	4	2	2	2	5	2	2	4	3	70
175	1	3	4	3	1	3	4	2	4	3	4	3	3	2	3	4	4	2	2	4	4	4	3	2	3	2	4	4	70
176	2	1	3	1	2	2	4	2	4	4	4	2	4	4	4	5	4	3	2	2	4	2	2	4	2	2	4	2	70
177	2	1	2	1	2	2	4	4	4	2	4	3	2	3	4	4	3	4	4	2	3	3	2	4	2	3	4	2	70
178	2	4	4	4	1	2	5	4	4	4	4	3	3	2	4	4	4	4	2	2	2	2	3	4	2	2	3	2	69
179	1	2	4	2	1	2	4	4	5	2	4	4	2	4	4	4	4	4	4	2	4	2	2	2	2	2	2	2	69
180	2	3	3	4	2	2	3	3	3	4	3	3	3	3	4	3	3	3	4	3	3	2	3	3	3	3	4	3	69
181	2	2	3	2	1	2	4	4	4	3	3	3	4	3	4	2	3	3	3	4	3	3	2	2	2	2	5	3	69
182	1	1	4	1	1	2	4	4	4	2	4	4	2	2	4	4	4	4	4	2	2	2	2	2	2	4	4	3	69
183	2	1	3	1	1	2	1	3	5	3	4	4	2	4	4	2	4	4	4	2	4	2	2	4	2	3	4	2	69
184	2	1	3	1	1	2	2	3	3	3	3	4	4	3	4	4	2	4	4	2	3	3	3	4	2	2	4	3	69
185	1	2	4	2	1	1	4	3	4	3	4	4	3	3	4	3	3	4	4	3	3	2	3	2	2	2	3	3	69
186	1	1	3	1	2	2	4	3	2	1	2	2	3	4	4	4	4	4	4	4	3	3	4	2	2	3	4	2	68
187	1	1	3	1	2	2	4	3	2	1	2	2	3	4	4	4	4	4	4	4	3	3	4	2	2	3	4	2	68
188	1	1	3	1	2	2	4	3	2	1	2	2	3	4	4	4	4	4	4	4	3	3	4	2	2	3	4	2	68
189	1	1	3	1	2	2	4	3	2	1	2	2	3	4	4	4	4	4	4	4	3	3	4	2	2	3	4	2	68
190	1	1	3	1	2	2	4	3	2	1	2	2	3	4	4	4	4	4	4	4	3	3	4	2	2	3	4	2	68
191	2	2	4	2	3	1	5	5	4	4	2	5	4	2	3	2	2	2	4	4	2	2	2	4	2	2	4	2	68
192	1	4	4	4	1	2	5	4	4	2	3	3	4	2	4	3	3	4	3	2	3	2	2	4	2	2	3	4	68
193	1	3	4	3	2	2	5	3	4	3	4	2	3	3	4	3	3	4	3	3	4	2	2	2	3	3	2	3	68
194	2	3	3	3	2	2	5	4	1	2	3	5	4	3	4	4	1	1	4	4	3	2	3	3	2	2	4	4	68
195	2	4	2	1	4	2	4	3	3	2	4	4	4	4	2	2	1	4	5	3	3	2	3	4	2	2	4	3	68
196	2	1	3	1	2	3	4	2	4	4	5	2	1	4	4	5	4	4	4	4	4	2	3	1	2	2	2	1	68
197	2	3	4	2	3	2	4	4	4	3	4	2	3	4	4	2	2	4	4	2	2	2	2	4	2	4	3	2	67
198	2	3	4	2	4	2	4	3	4	2	2	3	4	4	4	4	4	3	2	2	3	3	3	3	3	2	3	2	67
199	2	4	4	5	2	2	5	4	4	2	3	4	2	3	4	4	2	4	2	2	3	2	2	4	2	4	3	2	67
200	1	3	4	2	4	1	5	4	4	2	2	5	4	2	2	2	2	4	4	3	3	2	2	4	3	3	3	2	67
201	1	4	2	5	4	2	5	5	5	2	2	2	4	4	2	4	4	4	4	2	2	2	2	4	2	2	2	2	67
202	2	1	3	1	1	2	4	2	4	2	4	2	4	3	4	4	2	2	4	4	4	2	2	1	3	2	4	4	67
203	1	2	3	1	1	2	4	4	4	2	3	4	3	4	2	4	4	4	2	2	2	3	2	4	2	2	4	2	67
204	1	4	3	5	2	3	4	3	4	3	3	4	2	4	4	3	3	3	3	4	3	3	3	1	2	3	2	3	67
205	1	4	2	5	4	2	4	4	3	4	4	3	2	2	2	4	3	3	2	4	3	3	3	3	2	2	3	4	67
206	2	2	3	1	2	2	4	4	4	2	2	4	4	4	4	2	2	4	4	2	2	2	2	3	2	2	4	4	67
207	1	2	3	1	1	2	3	5	4	2	2	4	2	4	4	4	4	4	4	2	2	4	2	2	2	2	2	3	67
208	2	1	2	1	4	2	5	4	3	2	2	4	2	4	4	3	4	4	2	3	3	3	3	4	1	2	2	2	66
209	1	1	3	1	2	3	4	3	4	1	2	4	2	4	4	5	4	4	3	2	3	3	3	2	2	3	2	2	66
210	2	3	3	2	4	1	4	4	4	2	4	4	2	2	4	2	2	4	4	2	2	3	3	4	2	2	4	2	66
211	1	3	3	3	4	3	3	3	4	2	4	4	2	4	2	2	2	4	4	3	3	3	3	3	2	3	3	3	66
212	2	3	4	1	1	3	5	4	2	1	2	4	3	4	4	2	2	4	3	4	3	2	2	5	1	3	4	2	66
213	1	3	3	4	3	2	4	1	4	2	4	2	4	2	2	4	2	4	4	4	4	4	4	2	2	3	2	2	66
214	1	3	3	2	4	3	2	2	3	4	4	2	2	2	2	1	2	1	2	2	5	5	4	1	5	5	5	5	66
215	1	1	2	1	1	2	4	3	2	2	2	4	2	4	2	4	2	4	1	3	4	4	4	4	4	2	3	1	65
216	2	2	4	1	1	2	5	3	4	3	2	4	2	2	4	3	3	3	2	2	3	3	2	4	2	3	3	3	65
217	1	3	3	2	1	2	4	4	4	3	3	4	4	3	4	4	4	2	4	3	2	1	2	3	2	2	1	2	65
218	1	3	3	4	6	4	3	3	4	3	4	3	3	3	3	3	3	3	3	2	3	2	3	2	3	3	3	3	65
219	2	3	4	2	1	1	5	4	3	2	4	3	3	2	4	3	3	4	2	2	3	2	2	3	3	2	3	3	65
220	1	3	4	4	2	2	4	2	4	2	4	4	5	2	4	5	4	4	2	2	2	2	2	3	2	2	2	2	65
221	2	4	4	3	2	2	4	3	3	2	4	3	3	3	3	2	3	3	4	2	3	3	2	4	2	3	3	3	65
222	2	3	3	4	1	4	3	3	4	3	4	3	2	2	3	2	2	3	3	4	3	3	3	3	3	3	3	3	65
223	2	3	2	4	4	3	5	2	4	2	4	4	2	3	2	4	4	3	3	3	4	2	3	2	2	3	2	2	65
224	1	1	2	1	3	2	4	3	4	4	4	1	1	4	2	2	1	4	2	4	2	3	3	4	3	3	3	4	65
225	1	3	4	3	1	1	4	4	4	3	3	4	3	2	4	3	3	3	2	2	2	2	2	5	2	2	3	3	65
226	2	3	4	4	1	3	5	3	4	1	4	2	4	2	4	4	2	2	2	5	3	2	2	4	2	2	4	2	65
227	1	2	4	2	3	3	5	3	5	2	3	2	4	1	4	5	4	4	4	2	2	2	3	1	2	1	4	2	65
228	1	1	3	1	1	1	4	2	4	2	2	4	2	3	4	4	4	4	4	2	4	2	2	4	2	2	2	1	64
229	1	3	4	3	4	2	4	2	4	4	5	2	4	2	2	4	2	3	2	3	3	3	4	2	3	2	2	2	64
230	1	3	4	3	4	2	4	3	5	3	4	3	4	2	3	2	2	4	3	2	3	2	3	2	2	3	2	3	64
231	2	1	3	1	3	1	5	4	4	3	3	4	3	4	3	3	2	4	2	2	3	2	2	2	1	2	4	2	64
232	2	3	4	2	1	3	5	4	5	2	4	2	4	2	2	4	2	2	2	5	2	2	2	2	2	3	4	2	64
233	2	3	4	3	4	2	4	4	4	2	2	4	4	3	2	3	2	4	2	2	2	2	3	4	2	3	4	2	64
234	1	2	4	3	3	2	5	3	4	2	2	2	2	2	4	4	4	2	3	4	2	2	3	2	2	2	4	4	64
235	2	1	2	1	4	3	5	3	4	2	4	3	4	4	2	2	2	2	3	2	4	3	3	2	2	2	3	2	63
236	1	3	3	3	4	3	4	2	3	2	4	4	2	2	4	1	2	4	2	3	3	3	4	2	2	3	3	4	63
237	2	3	3	4	1	3	5	3	3	3	3	3	1	2	3	3	2	3	4	2	4	2	4	4	2	3	2	2	63
238	2	3	3	4	1	3	4	4	2	1	3	4	3	2	3	2	2	2	4	2	4	2	3	4	2	4	2	4	63
239	1	4	4	5	3	3	4	3	2	2	4	2	2	2	4	4	2	3	2	4	4	3	3	2	3	2	3	3	63
240	1	5	4	5	4	1	5	4	3	3	3	3	2	3	3	2	2	4	3	2	3	2	2	2	3	3	3	3	63
241	1	2	4	2	1	3	4	4	4	3	3	3	4	4	4	2	2	2	3	3	3	2	2	2	2	3	2	2	63
242	1	2	4	1	1	1	5	3	4	2	4	3	4	2	4	4	3	2	2	3	2	2	2	2	2	2	4	2	63
243	2	3	3	3	2	2	4	4	4	2	2	2	3	2	3	2	4	3	3	2	2	2	2	2	4	3	4	3	62
244	2	4	3	5	2	2	5	4	4	2	4	4	2	2	4	2	2	2	2	2	3	2	2	4	2	4	2	2	62
245	1	4	2	1	6	3	3	2	2	3	3	2	2	3	3	2	3	3	2	4	3	4	4	4	4	2	2	2	62
246	1	2	4	2	3	1	5	5	3	1	4	4	4	2	2	3	4	5	2	4	1	1	1	4	1	1	1	4	62
247	1	3	4	3	2	2	4	3	3	4	4	2	2	2	2	2	2	2	4	4	3	3	2	4	2	2	3	3	62
248	2	4	2	5	3	3	4	4	4	2	4	2	2	4	2	4	2	4	2	2	2	2	2	2	2	2	4	4	62
249	2	4	3	5	1	2	4	4	2	2	4	3	4	3	2	4	1	1	1	4	2	3	2	2	2	3	4	4	61
250	2	3	4	2	3	1	4	4	4	2	3	3	2	2	3	2	2	2	4	3	3	3	4	2	2	3	2	2	61
251	2	2	4	1	3	2	4	4	4	2	2	4	3	2	4	3	3	4	4	2	2	2	2	2	2	2	2	2	61
252	1	4	3	5	1	3	3	3	3	3	3	3	2	2	2	2	2	3	3	3	3	3	3	3	3	3	3	3	61
253	2	3	3	3	4	2	4	2	2	2	3	2	2	4	2	4	2	2	2	2	4	4	4	2	4	4	2	2	61
254	2	2	4	2	1	2	4	4	3	2	2	4	3	4	4	4	2	4	2	1	2	2	3	4	2	2	2	1	61
255	1	2	2	2	4	2	4	3	4	3	3	2	2	2	3	3	2	2	4	3	3	3	3	2	3	3	2	2	61
256	2	4	4	5	5	3	4	4	5	3	5	2	2	2	3	2	1	3	2	2	2	2	3	4	2	2	3	3	61
257	1	3	4	3	4	2	4	4	4	3	2	3	3	3	4	3	3	4	4	2	2	2	2	2	2	3	1	1	61
258	1	3	4	3	4	1	5	2	3	1	3	2	3	1	4	5	3	2	1	5	1	2	5	1	2	3	3	3	60
259	1	2	3	1	1	2	4	4	2	1	3	2	1	1	4	1	3	4	4	2	3	2	3	3	2	3	4	4	60
260	1	2	4	2	1	1	5	5	4	1	1	2	2	2	2	2	2	2	2	2	4	4	4	2	1	1	5	5	60
261	1	3	4	2	2	3	4	2	2	2	2	2	2	4	2	4	3	4	3	3	3	3	3	2	2	2	4	2	60
262	1	3	4	1	3	2	4	3	3	2	2	2	2	2	4	2	2	4	2	3	2	2	2	4	2	3	4	3	59
263	1	4	4	5	1	2	5	4	4	1	2	2	3	4	4	3	2	2	2	2	2	2	2	4	2	2	3	2	59
264	2	3	4	3	3	2	5	3	2	2	2	2	3	4	3	2	3	2	2	2	3	2	3	4	2	4	2	2	59
265	1	3	4	1	1	2	4	4	2	2	4	3	3	3	2	3	2	2	2	3	4	3	2	2	2	2	2	2	58
266	1	5	4	5	1	1	4	4	4	2	2	3	2	3	4	2	2	4	3	2	2	2	2	3	1	2	2	3	58
267	1	1	4	1	1	2	4	3	4	2	2	2	2	2	3	4	3	2	2	2	2	3	2	4	2	2	4	2	58
268	1	3	3	2	4	2	4	3	2	2	5	2	2	4	2	4	2	2	2	3	2	4	2	2	2	2	2	2	57
269	2	4	3	4	1	4	4	4	2	1	2	3	5	1	1	4	3	1	2	4	3	2	1	5	1	1	4	3	57
270	2	3	4	5	2	2	4	4	2	2	2	2	4	2	2	4	2	2	2	2	2	2	4	4	2	2	2	2	56
271	1	4	3	5	2	3	4	4	2	2	2	2	2	2	2	5	2	2	2	5	2	2	2	4	2	2	2	2	56
272	1	2	4	2	1	2	5	4	2	2	2	2	4	3	2	2	2	2	2	2	2	2	2	3	2	2	3	4	56
273	1	4	4	3	2	1	4	4	4	1	2	2	1	3	3	2	2	2	2	2	2	2	2	4	2	2	4	3	55
274	2	4	2	5	4	2	3	3	2	2	4	2	2	2	3	2	2	2	3	2	3	3	3	3	2	3	2	2	55
275	1	4	3	2	3	2	4	4	4	2	2	2	2	2	2	2	2	2	2	3	2	2	2	4	2	2	3	3	55
276	1	4	3	5	3	1	4	4	4	2	2	4	2	2	2	2	2	2	2	2	2	2	2	4	2	2	2	2	54
277	1	3	4	2	3	1	5	4	4	2	2	2	2	2	3	1	2	2	2	3	2	2	3	2	3	2	2	2	54
278	1	3	4	3	2	1	4	3	4	2	2	2	2	2	2	2	2	2	2	2	3	2	3	3	2	3	2	2	53
279	2	4	2	5	4	2	4	4	2	2	2	4	2	2	2	2	2	2	2	2	2	2	2	4	2	3	2	2	53
280	1	2	3	2	4	3	4	3	2	2	4	2	2	2	2	2	2	2	2	2	4	4	2	2	2	2	2	2	53
281	2	4	3	5	4	2	4	2	2	2	5	4	2	2	4	2	2	2	2	2	2	2	2	2	2	1	3	2	53
282	1	5	3	5	1	1	5	4	4	1	1	2	2	2	1	2	1	2	2	2	2	2	2	4	2	2	3	4	52
283	2	3	4	3	1	1	5	4	4	2	2	2	2	2	2	2	2	2	2	2	2	2	2	2	2	2	3	2	52
284	1	2	4	2	3	1	2	2	2	2	2	2	2	2	3	4	2	3	2	3	2	2	2	3	2	3	2	2	51
285	2	3	4	3	1	3	4	3	3	1	2	3	1	2	4	2	2	2	2	1	3	2	2	3	2	2	2	2	50
286	1	2	3	1	4	2	4	2	4	2	2	2	2	2	2	2	2	4	2	2	2	2	2	2	2	2	2	2	50
287	1	3	2	4	4	2	3	3	3	2	2	2	3	2	2	2	1	2	2	1	3	2	2	4	2	3	2	2	50
288	1	3	4	2	1	1	4	4	2	2	2	2	2	2	2	2	2	2	2	2	2	2	2	4	1	2	2	2	49
289	1	4	4	4	1	2	5	4	2	1	1	2	3	1	2	3	2	2	2	2	2	2	2	3	2	2	2	1	48
290	1	3	2	4	4	2	1	4	2	2	2	2	2	2	3	2	2	2	2	2	2	2	2	3	2	2	2	2	47
291	1	3	4	3	4	3	3	3	2	2	2	2	2	2	1	1	1	1	1	2	4	4	5	1	2	3	1	1	46
292	2	3	4	2	2	2	4	4	2	1	4	1	1	2	1	1	1	1	1	1	2	1	4	2	1	1	2	1	39
293	2	3	2	4	4	1	4	4	1	1	2	1	1	2	1	1	1	1	1	1	2	2	2	4	2	2	1	1	38
294	2	4	3	4	4	1	5	5	2	1	1	1	1	2	1	1	1	1	1	1	2	1	1	5	1	1	2	1	38

## Sheet: Sheet2
S12	S27	S28
0	5	5
5	5	5
5	5	5
5	5	5
5	5	5
5	5	5
5	5	5
5	5	5
5	5	5
5	5	5
5	5	5
5	5	5
5	5	5
5	5	5
5	5	5
5	5	5
5	5	5
5	5	5
5	5	5
5	5	5
5	5	5
5	5	5
5	5	4
5	5	4
5	5	4
5	5	4
5	5	4
5	5	4
5	5	4
5	5	4
5	5	4
5	5	4
5	5	4
5	5	4
5	5	4
5	5	4
5	5	4
5	5	4
5	5	4
5	5	4
5	5	4
4	5	4
4	5	4
4	4	4
4	4	4
4	4	4
4	4	4
4	4	4
4	4	4
4	4	4
4	4	4
4	4	4
4	4	4
4	4	4
4	4	4
4	4	4
4	4	4
4	4	4
4	4	4
4	4	4
4	4	4
4	4	4
4	4	4
4	4	4
4	4	4
4	4	4
4	4	4
4	4	4
4	4	4
4	4	4
4	4	4
4	4	4
4	4	4
4	4	4
4	4	4
4	4	4
4	4	4
4	4	4
4	4	4
4	4	4
4	4	4
4	4	4
4	4	4
4	4	4
4	4	4
4	4	4
4	4	4
4	4	4
4	4	4
4	4	4
4	4	4
4	4	4
4	4	4
4	4	4
4	4	4
4	4	4
4	4	4
4	4	4
4	4	4
4	4	4
4	4	4
4	4	4
4	4	3
4	4	3
4	4	3
4	4	3
4	4	3
4	4	3
4	4	3
4	4	3
4	4	3
4	4	3
4	4	3
4	4	3
4	4	3
4	4	3
4	4	3
4	4	3
4	4	3
4	4	3
4	4	3
4	4	3
4	4	3
4	4	3
4	4	3
4	4	3
4	4	3
4	4	3
4	4	3
4	4	3
4	4	3
4	4	3
4	4	3
4	4	3
4	4	3
4	4	3
4	4	3
4	4	3
4	4	3
4	4	3
4	4	3
4	4	3
4	4	3
4	4	3
4	4	3
4	4	3
4	4	3
4	4	3
4	4	3
4	4	3
4	4	3
4	4	3
4	4	3
4	4	3
4	4	3
4	4	3
4	4	3
4	4	3
4	4	3
3	4	3
3	4	3
3	4	3
3	3	3
3	3	3
3	3	3
3	3	3
3	3	3
3	3	3
3	3	3
3	3	3
3	3	3
3	3	3
3	3	3
3	3	3
3	3	3
3	3	3
3	3	3
3	3	3
3	3	3
3	3	3
3	3	2
3	3	2
3	3	2
3	3	2
3	3	2
3	3	2
3	3	2
3	3	2
3	3	2
3	3	2
3	3	2
3	3	2
3	3	2
3	3	2
3	3	2
3	3	2
3	3	2
3	3	2
3	3	2
3	3	2
3	3	2
3	3	2
3	3	2
3	3	2
3	3	2
3	3	2
3	3	2
3	3	2
3	3	2
3	3	2
3	3	2
3	3	2
3	3	2
3	3	2
3	3	2
2	3	2
2	3	2
2	2	2
2	2	2
2	2	2
2	2	2
2	2	2
2	2	2
2	2	2
2	2	2
2	2	2
2	2	2
2	2	2
2	2	2
2	2	2
2	2	2
2	2	2
2	2	2
2	2	2
2	2	2
2	2	2
2	2	2
2	2	2
2	2	2
2	2	2
2	2	2
2	2	2
2	2	2
2	2	2
2	2	2
2	2	2
2	2	2
2	2	2
2	2	2
2	2	2
2	2	2
2	2	2
2	2	2
2	2	2
2	2	2
2	2	2
2	2	2
2	2	2
2	2	2
2	2	2
2	2	2
2	2	2
2	2	2
2	2	2
2	2	2
2	2	2
2	2	2
2	2	2
2	2	2
2	2	2
2	2	2
2	2	2
2	2	2
2	2	2
2	2	2
2	2	2
2	2	2
2	2	2
2	2	2
2	2	2
2	2	2
2	2	1
2	2	1
2	2	1
2	2	1
2	2	1
2	1	1
2	1	1
1	1	1
1	1	1
1	1	1
1	1	1
1	1	1
1	1	1
1
